# Supplementary material for: Homoselenacalix[4]arenes: synthetic exploration and metallosupramolecular chemistry
Source: Royal Society of Chemistry journal article supplement (doi:10.1039/c2ob25760b), 2012-01-01
Supplement: c2ob25760b.pdf [file c2ob25760b.pdf]

## Electronic Supplementary Information

# Homoselenacalix[4]arenes: synthetic exploration and metallo-supramolecular chemistry

Joice Thomas,<sup>a</sup> Liliana Dobrzańska,<sup>a</sup> Kristof Van Hecke,<sup>b,c</sup> Mahendra P. Sonawane,<sup>a</sup> Koen Robeyns,<sup>b,d</sup> Luc Van Meervelt,<sup>b</sup> Krzysztof Woźniak,<sup>e</sup> Mario Smet,<sup>a</sup> Wouter Maes<sup>\*a,f</sup> and Wim Dehaen<sup>\*a</sup>

<sup>a</sup> *Molecular Design and Synthesis, Department of Chemistry, KU Leuven, Celestijnenlaan 200F, 3001 Leuven, Belgium. Fax: +32 16327990; Tel: +32 16327439; E-mail: wim.dehaen@chem.kuleuven.be*

<sup>b</sup> *Biomolecular Architecture, Department of Chemistry, KU Leuven, Celestijnenlaan 200F, 3001 Leuven, Belgium.*

<sup>c</sup> *Inorganic and Physical Chemistry Group, Ghent University, Krijgslaan 281, Building S3, 9000 Ghent, Belgium.*

<sup>d</sup> *Institute of Condensed Matter and Nanosciences (IMCN), Université Catholique de Louvain (UCL), Bâtiment Lavoisier, Place Louis Pasteur 1 (Bte 3), 1348 Louvain-la-Neuve, Belgium.*

<sup>e</sup> *Department of Chemistry, Warsaw University, Pasteura 1, 02-093 Warsaw, Poland.*

<sup>f</sup> *Design & Synthesis of Organic Semiconductors (DSOS), Institute for Materials Research (IMO-IMOMEC), Hasselt University, Universitaire Campus, Agoralaan 1 – Building D, 3590 Diepenbeek, Belgium. Fax: +32 11268299; Tel: +32 11268312; E-mail: wouter.maes@uhasselt.be*

## Table of contents

|                                                                                                                                                                                                               |     |
|---------------------------------------------------------------------------------------------------------------------------------------------------------------------------------------------------------------|-----|
| 1. <sup>1</sup> H, <sup>13</sup> C and <sup>77</sup> Se NMR spectra for the novel precursors and homoselenacalix[ <i>n</i> ]arenes                                                                            | S2  |
| 2. X-ray crystallographic general experimental data and additional figures for the structures of homoselenacalix[ <i>n</i> ]arenes <b>4</b> ·THF, <b>10</b> , <b>19</b> , <b>20</b> , <b>21</b> and <b>22</b> | S15 |
| 3. FTMS (ESI <sup>+</sup> ) isotopic patterns for homoselenacalix[4]arene <b>10</b> and metal complexes <b>21</b> and <b>22</b>                                                                               | S19 |
| 4. References                                                                                                                                                                                                 | S22 |

# 1. $^1\text{H}$ , $^{13}\text{C}$ and $^{77}\text{Se}$ NMR spectra for the novel precursors and homoselenacalix[*n*]arenes

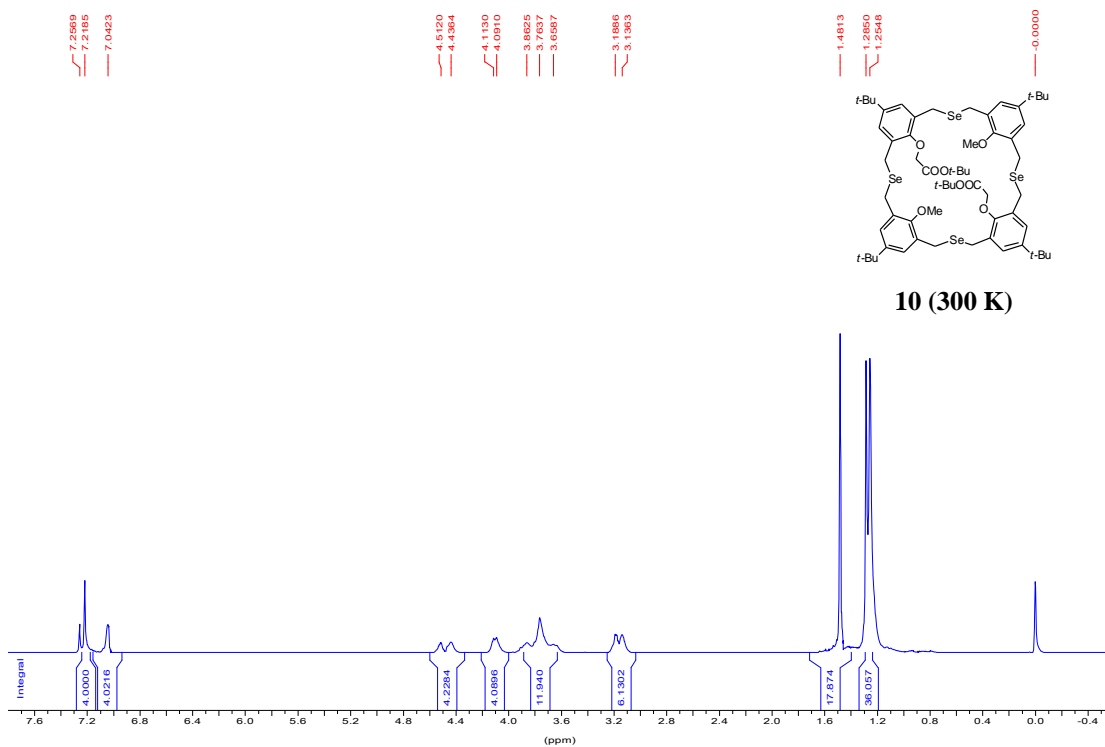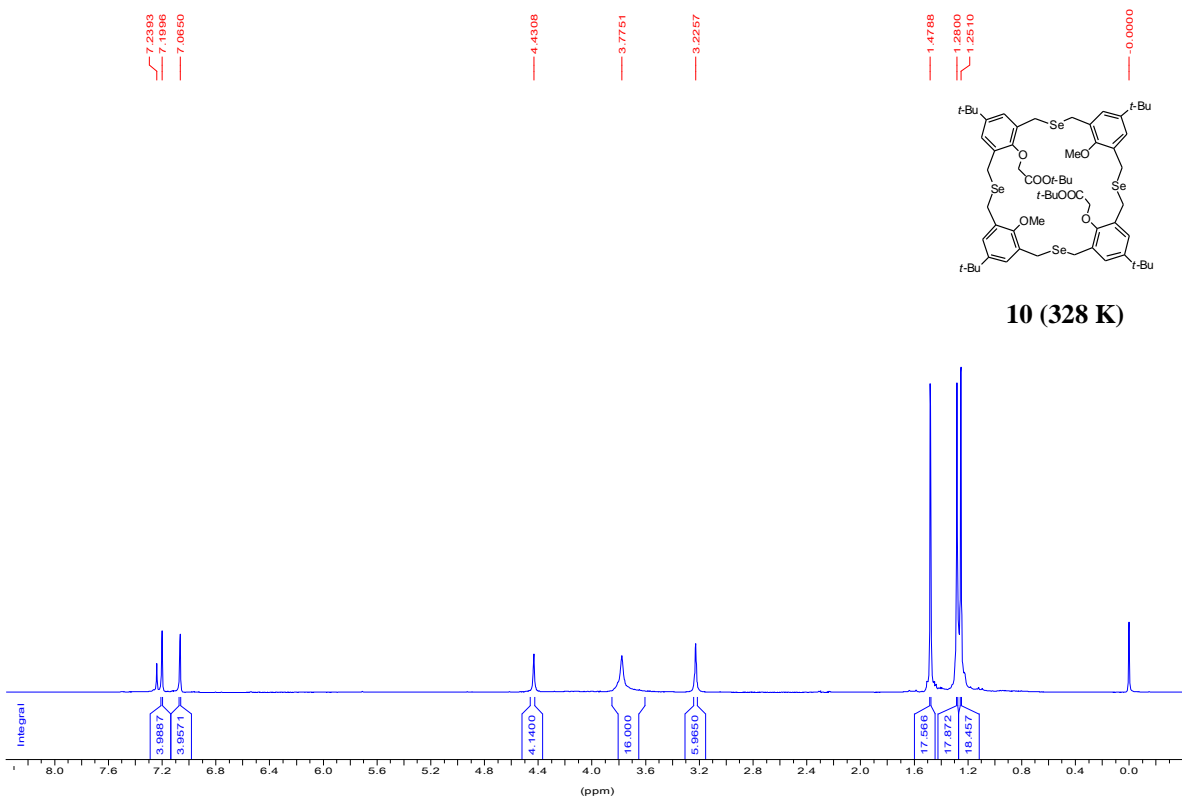

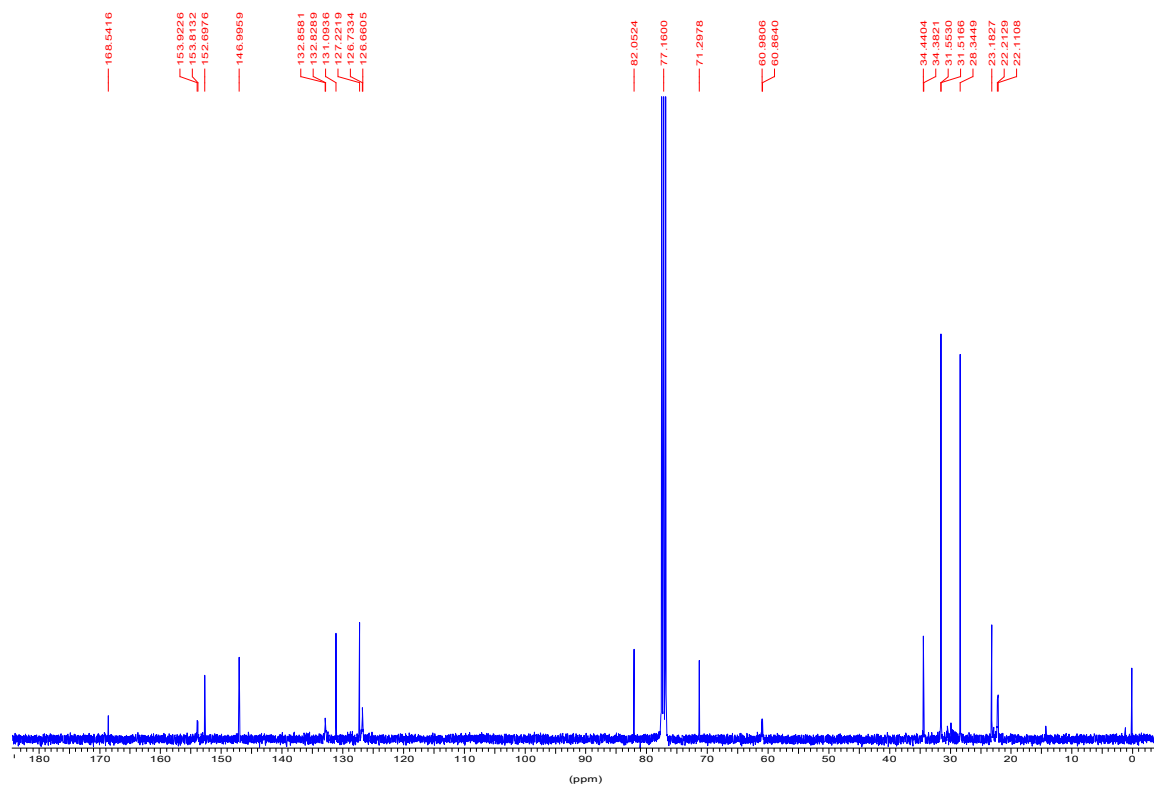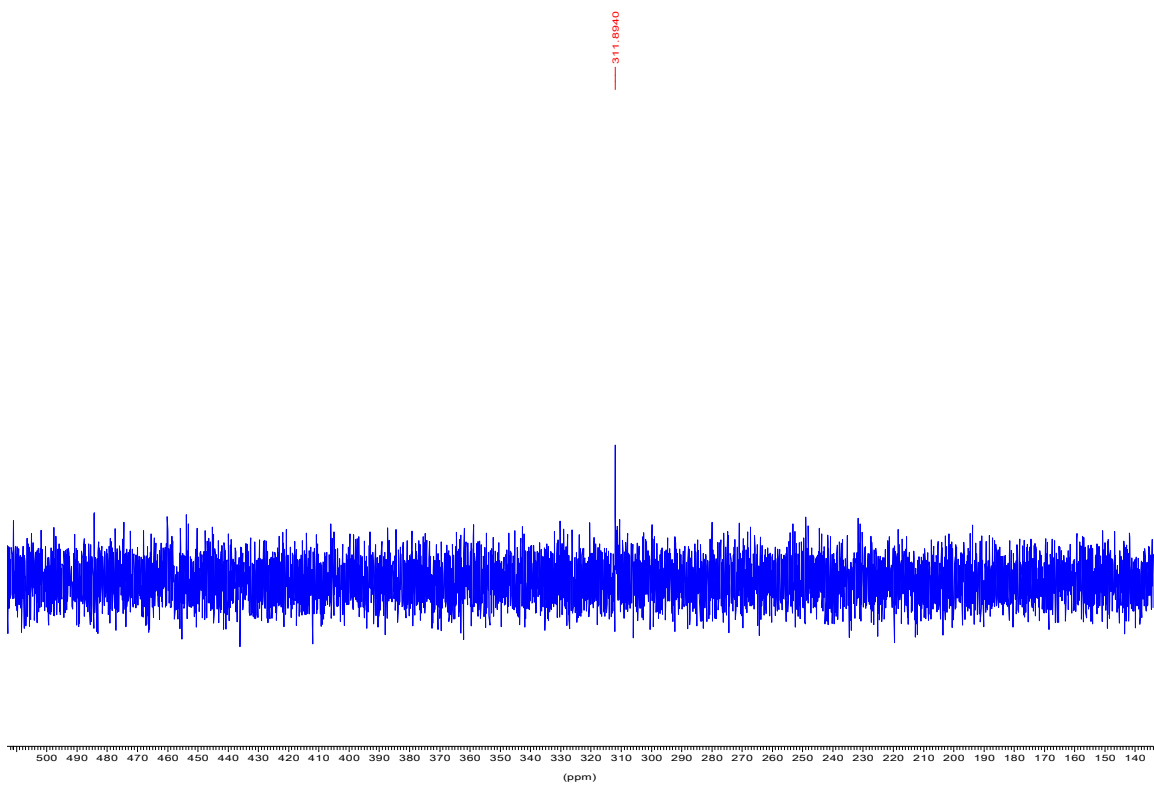

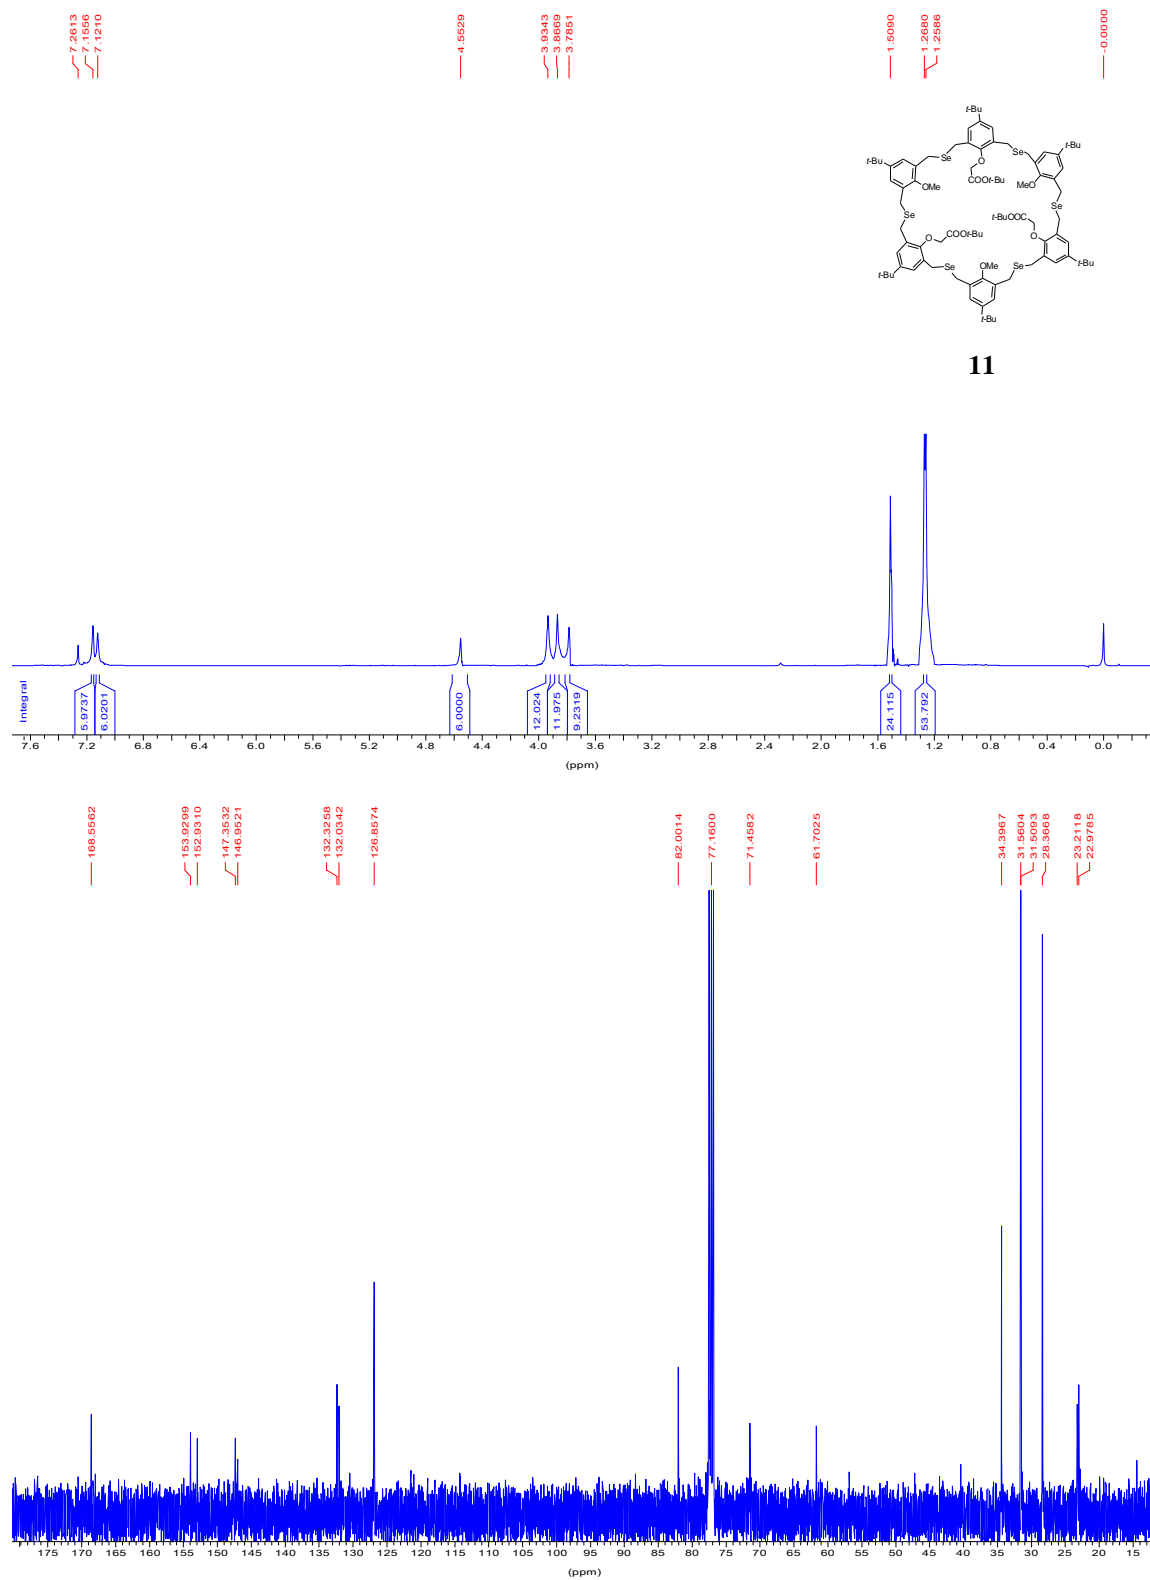

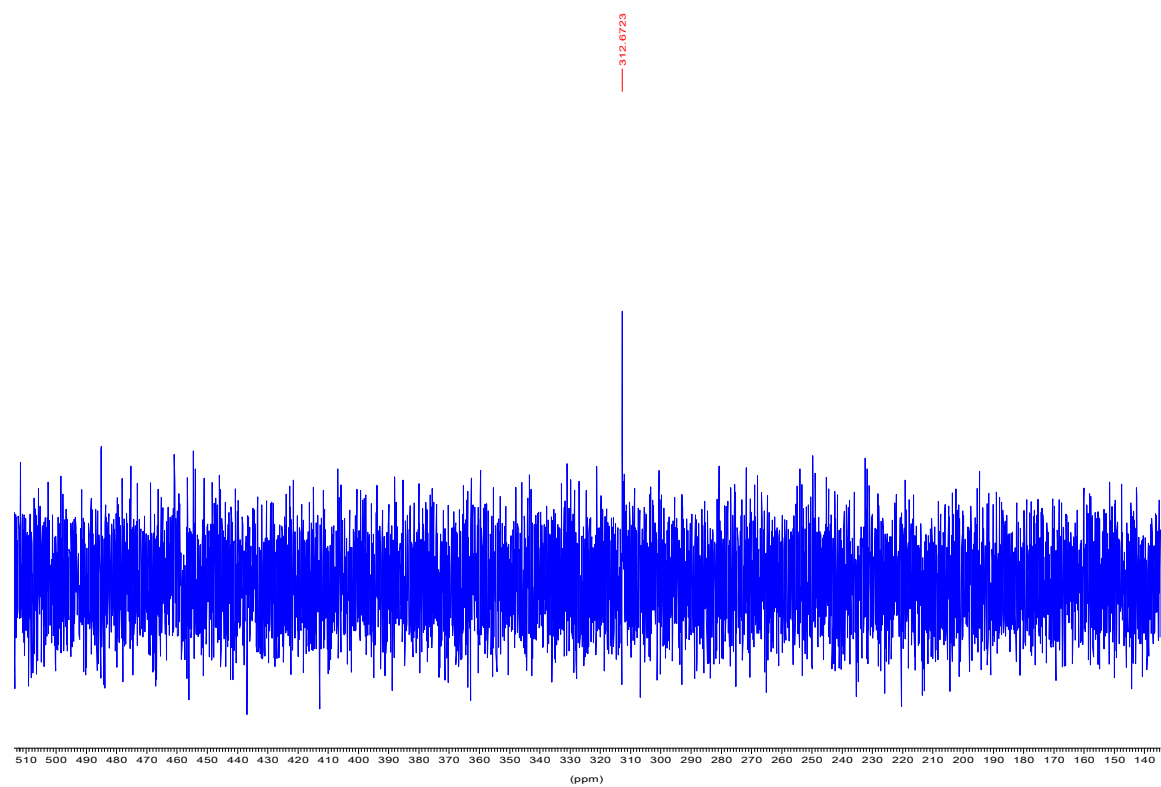

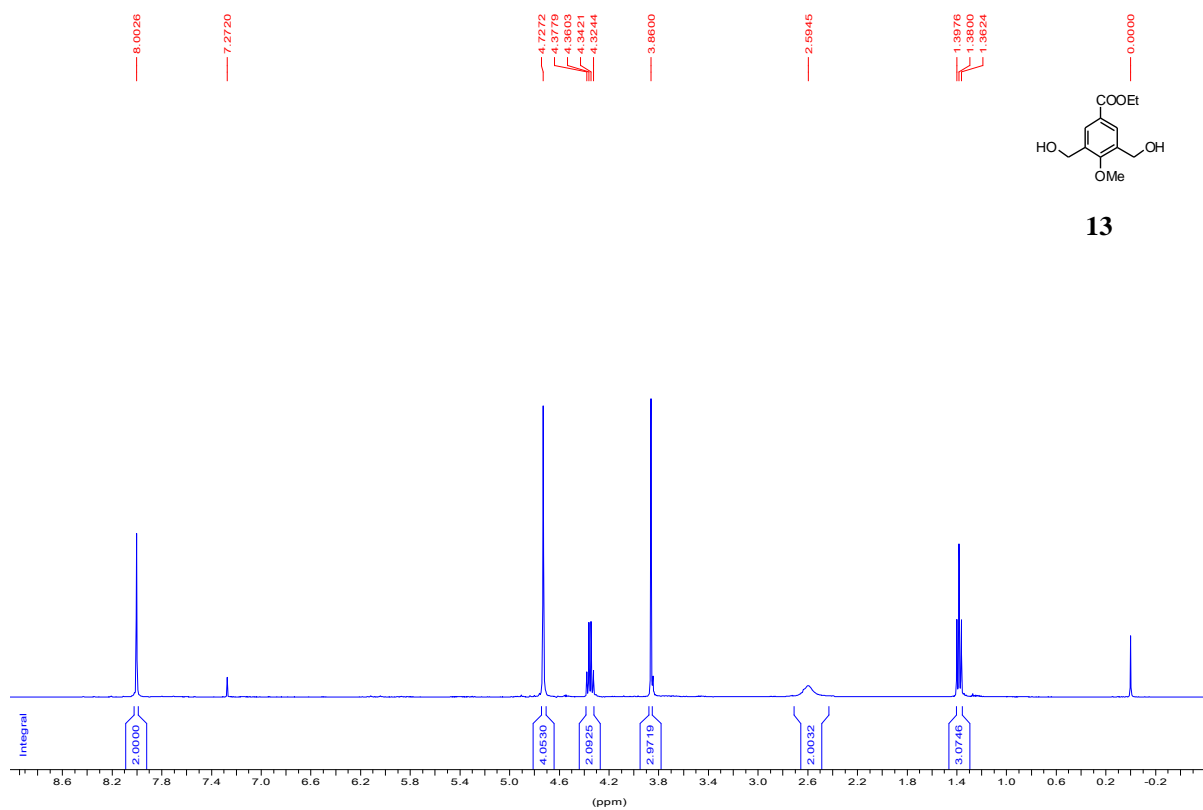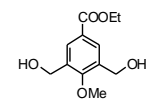

13

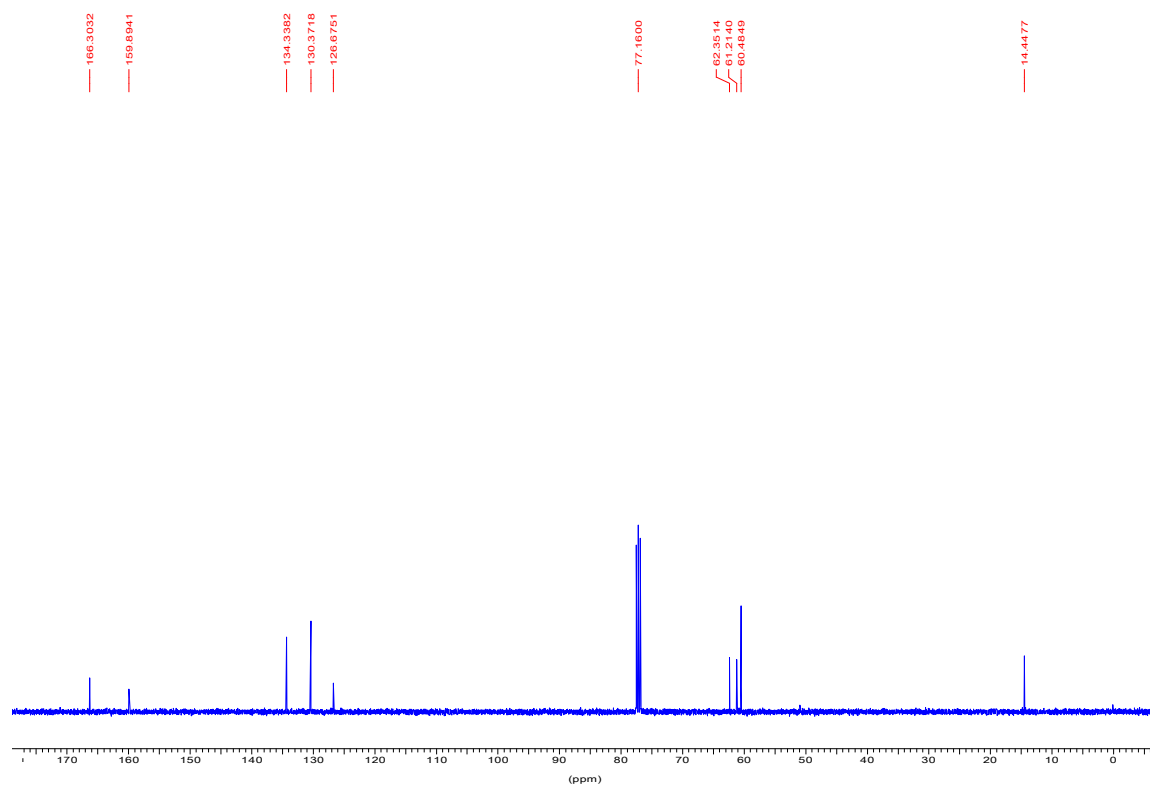

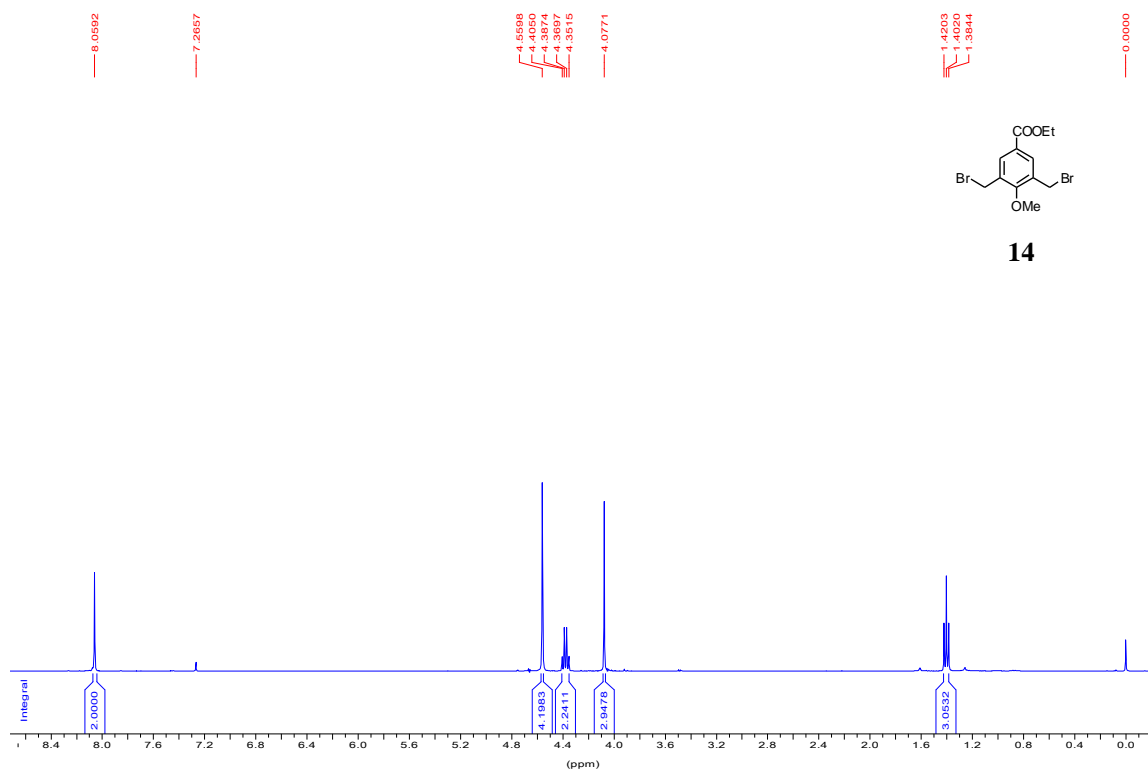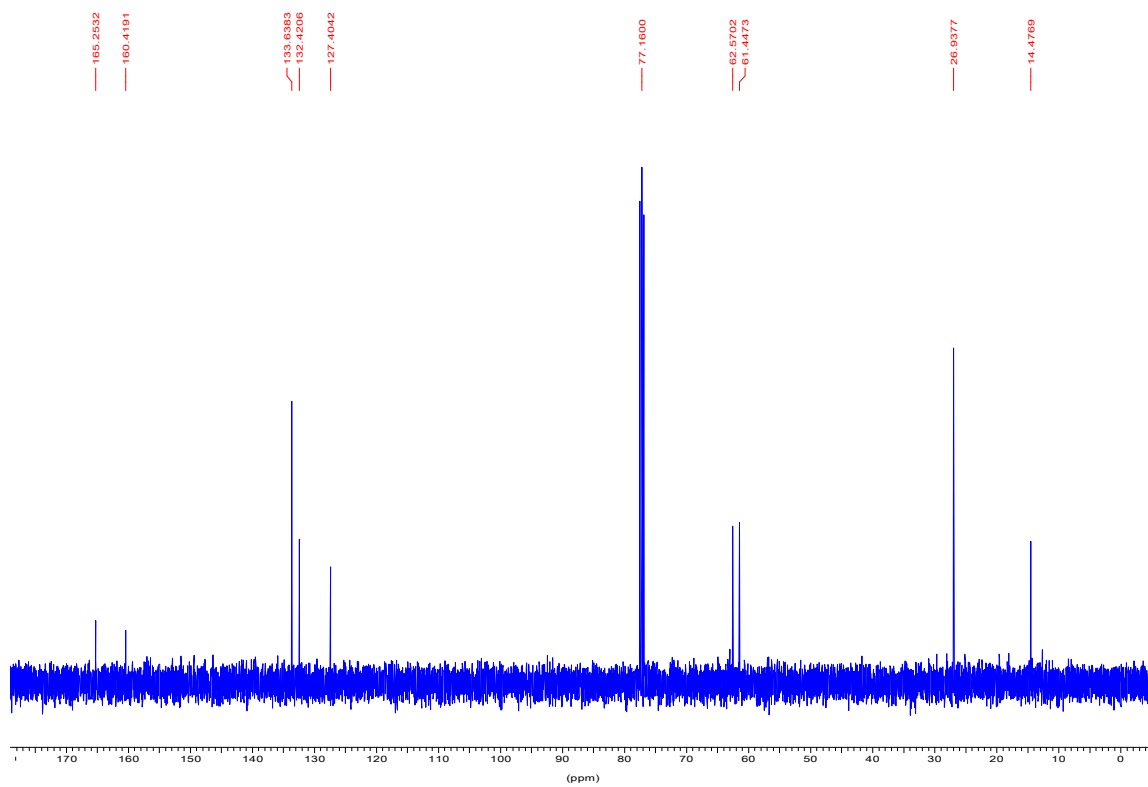

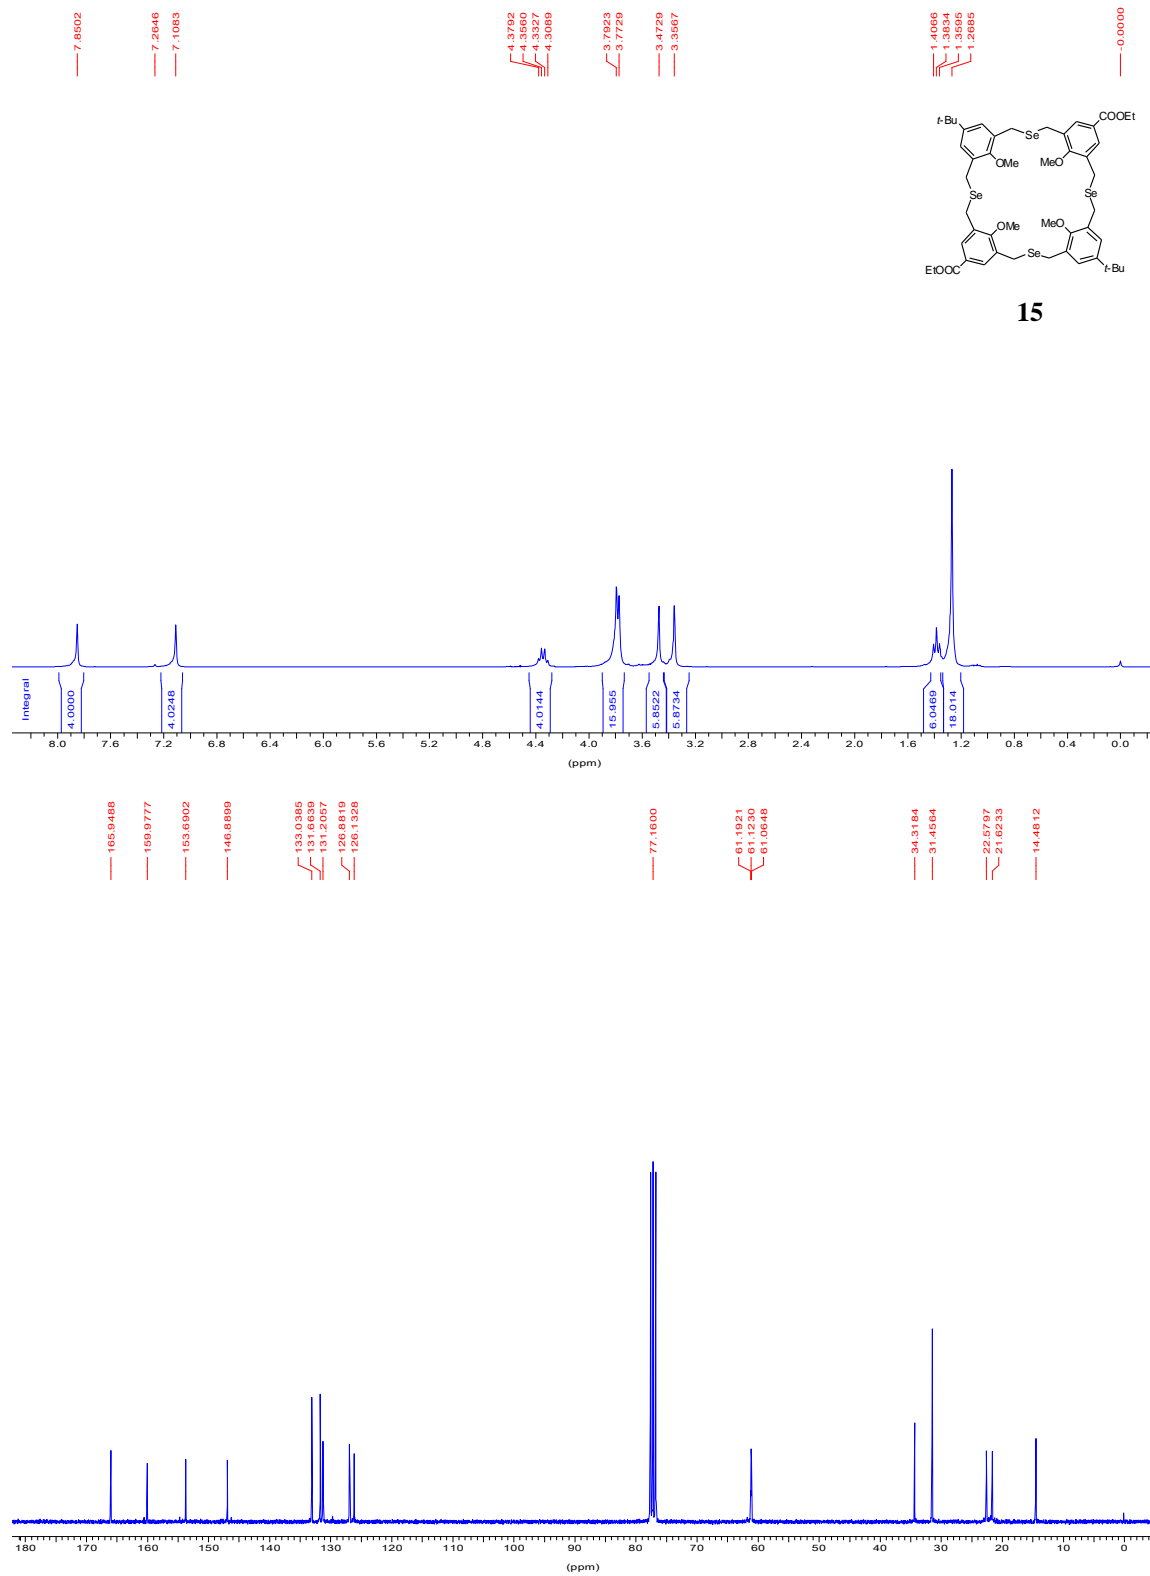





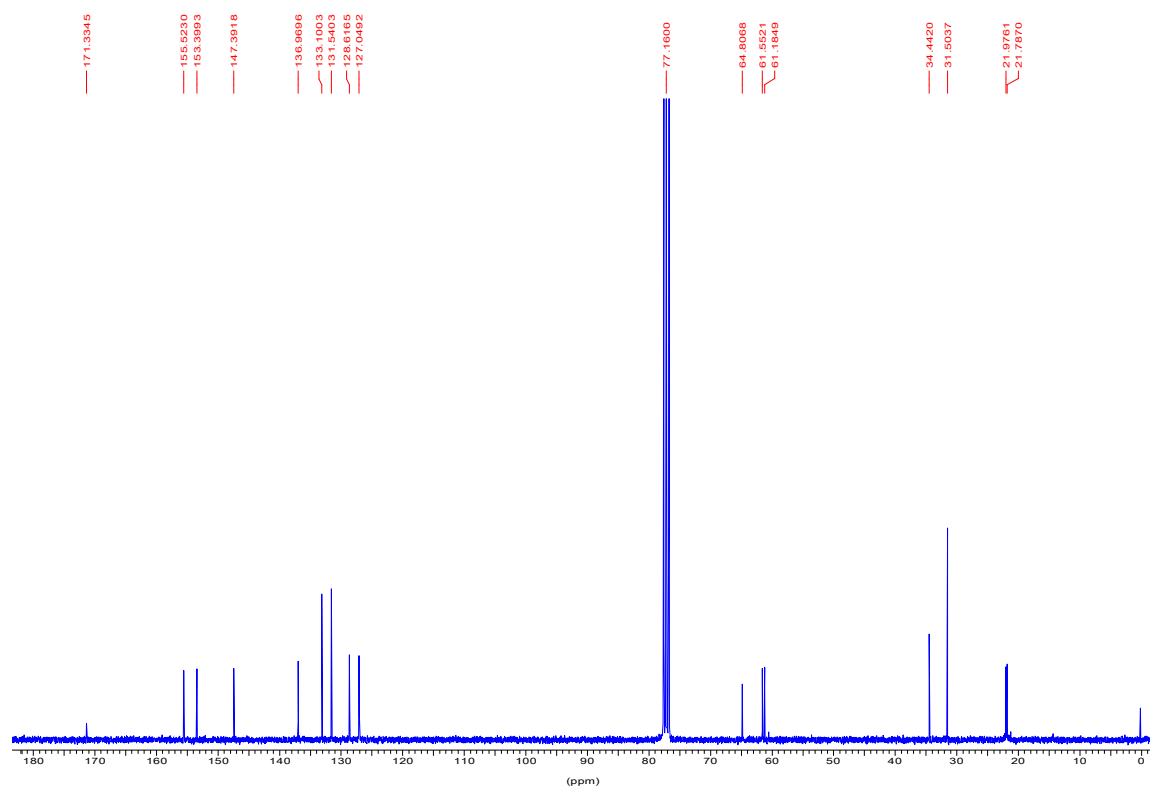

324.9836

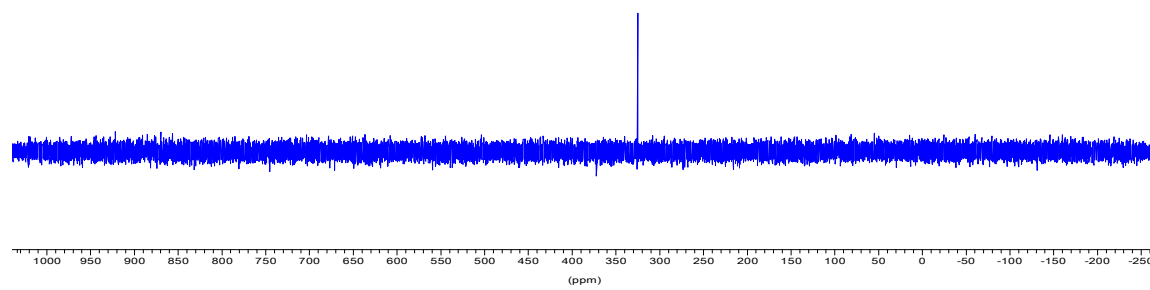

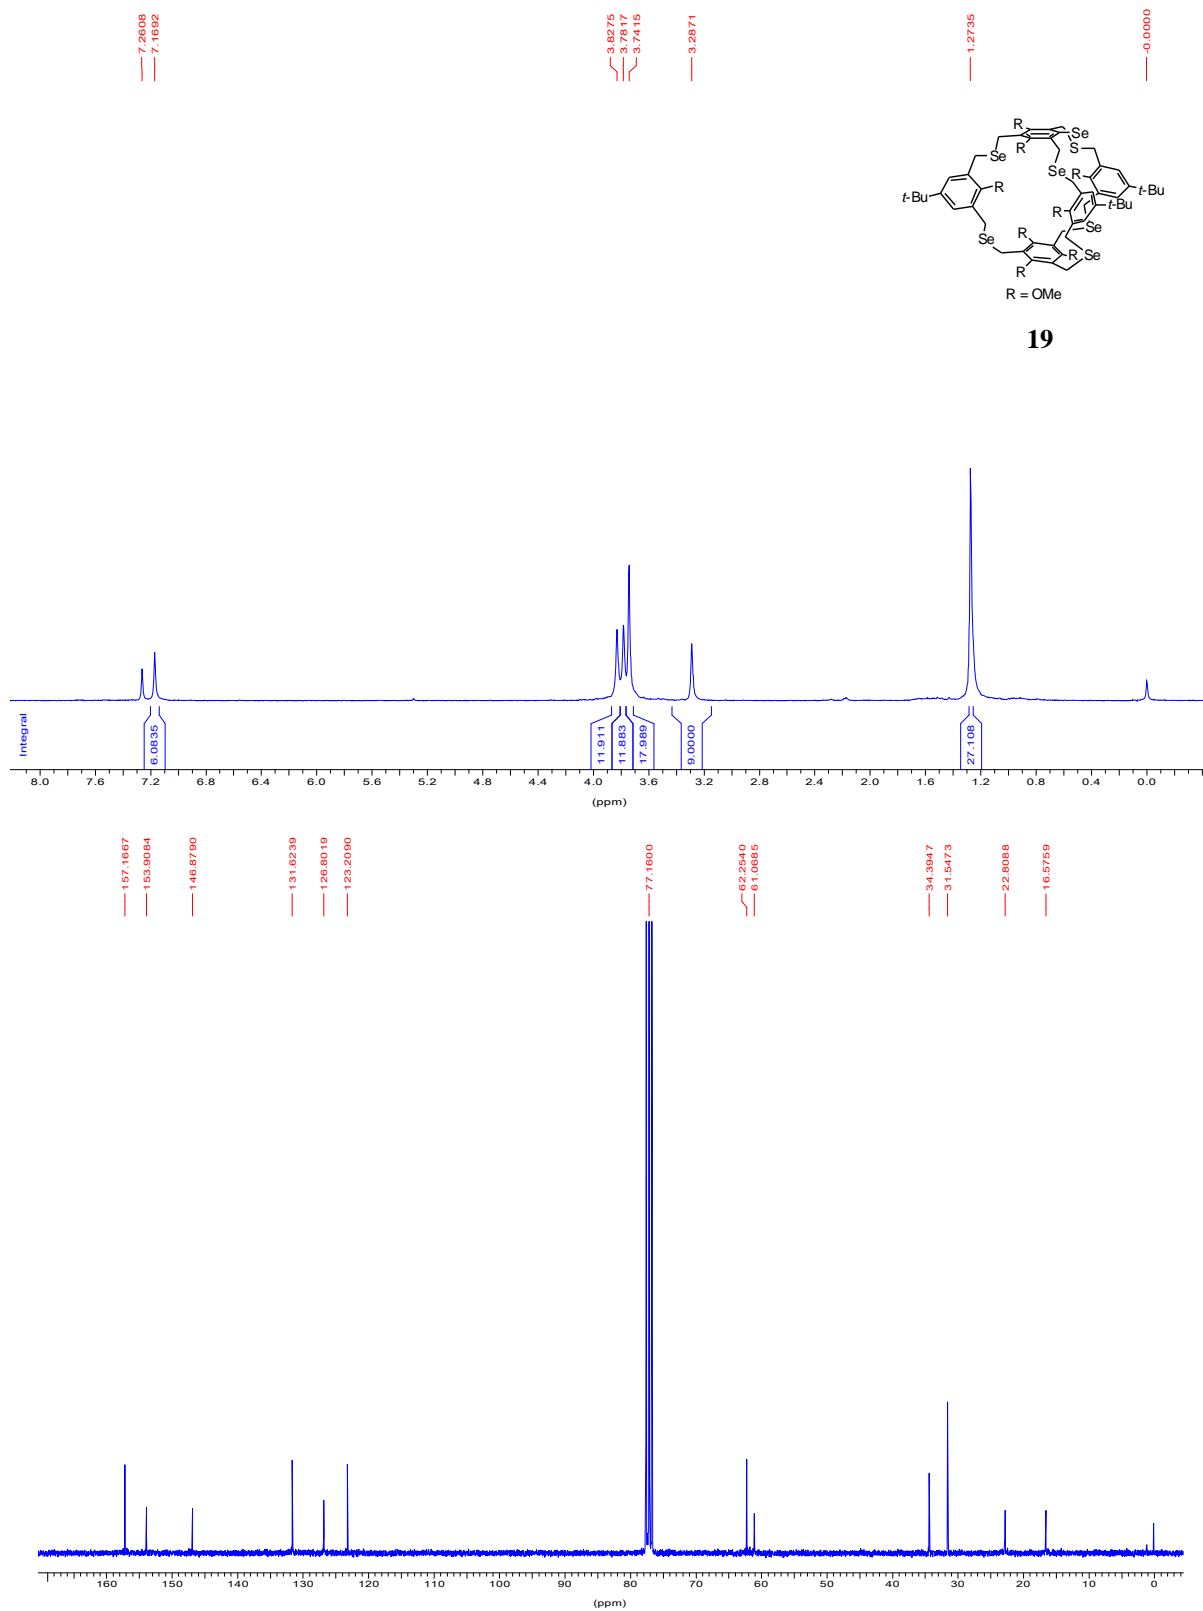

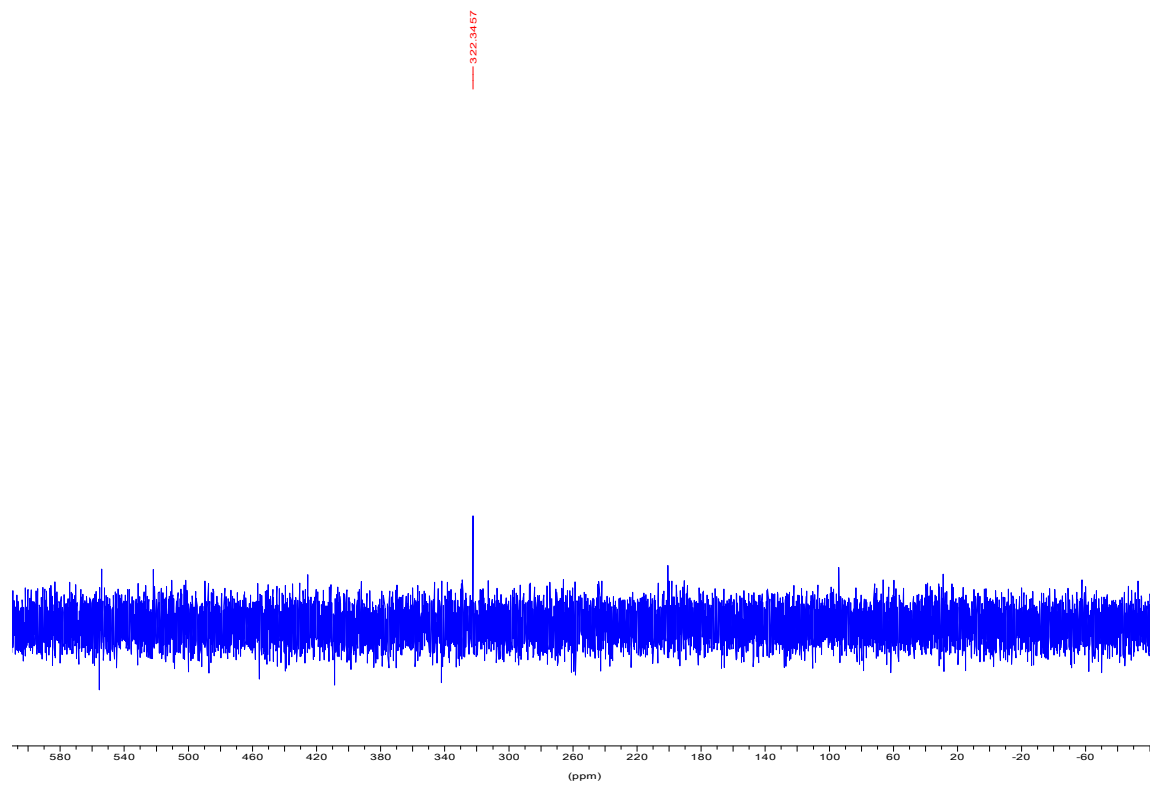

7.3308  
7.2847

322.3457

3.0064  
3.8328  
3.7963  
3.7293  
3.6806  
3.6350  
3.2148  
3.1722  
3.1093

2.4294

1.3608  
1.2938

-0.0000

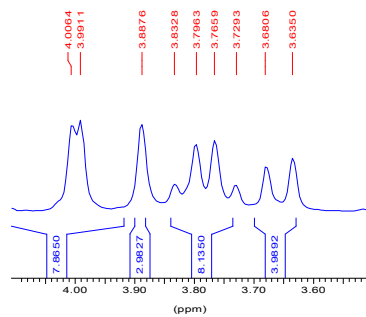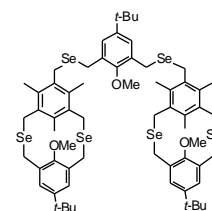

20

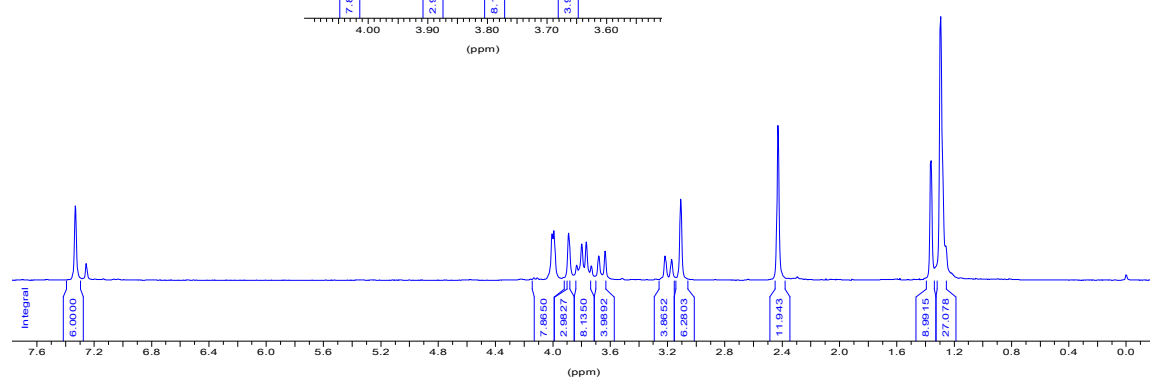

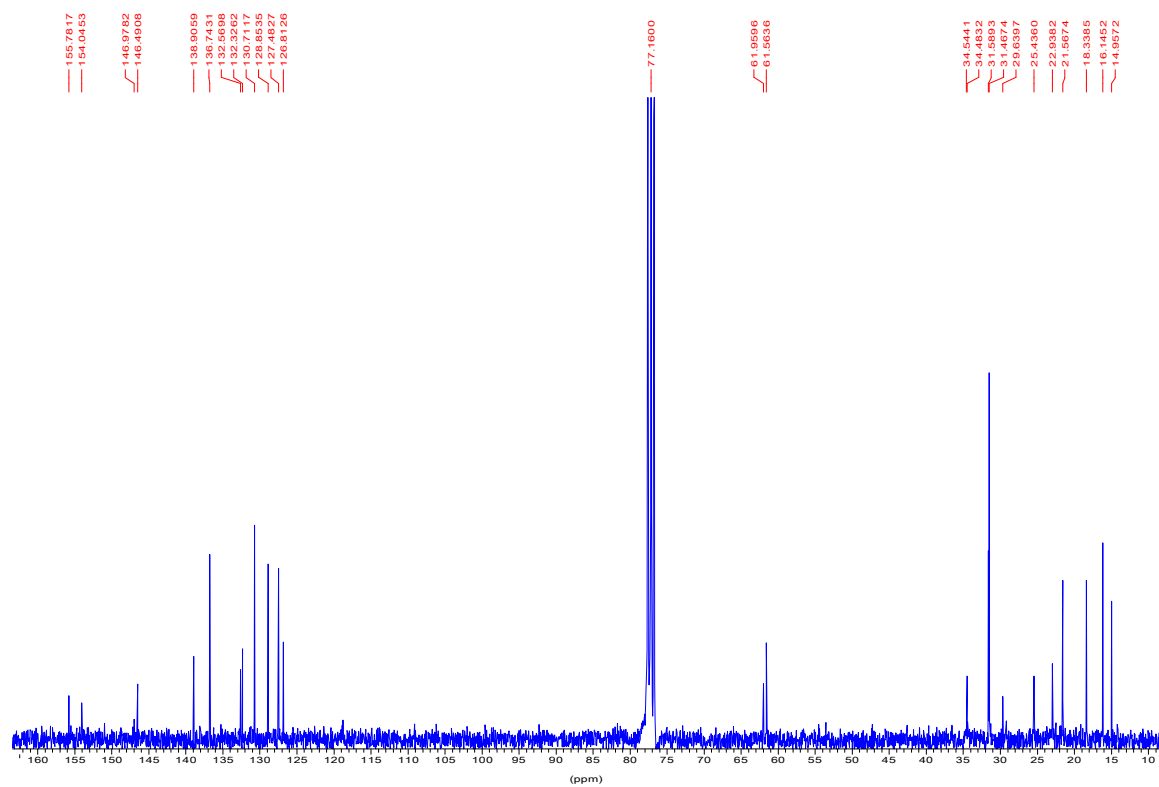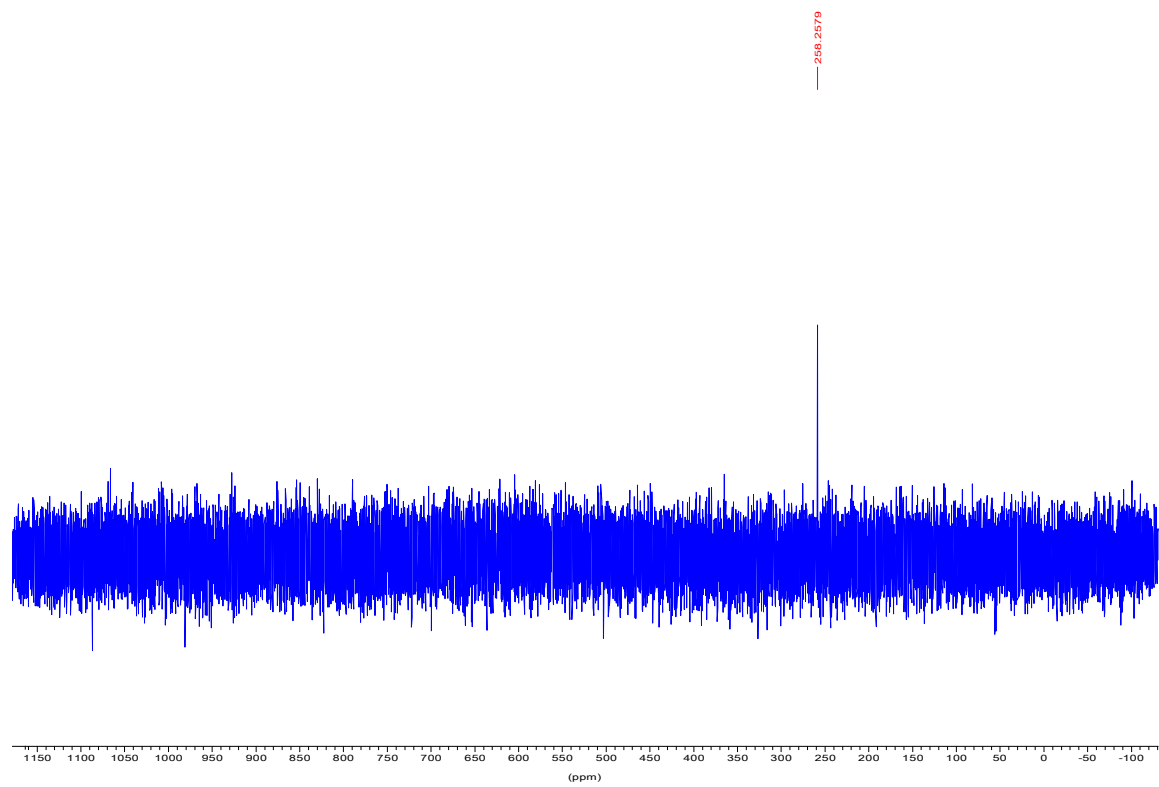

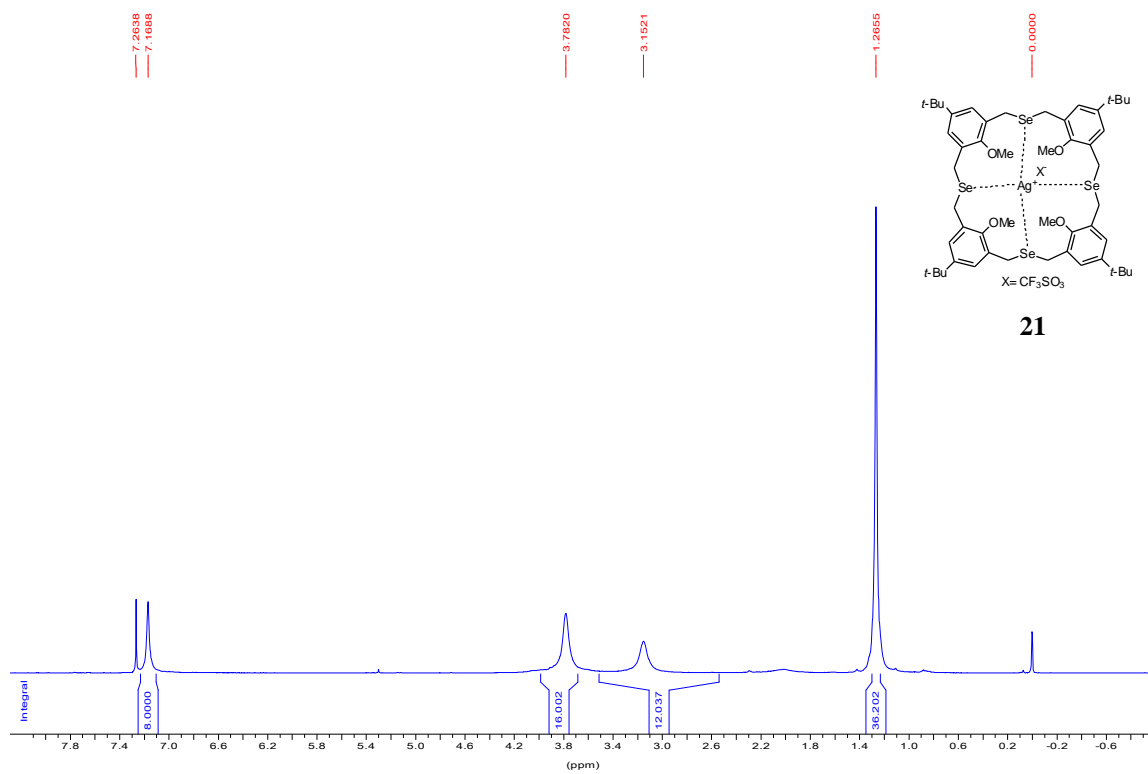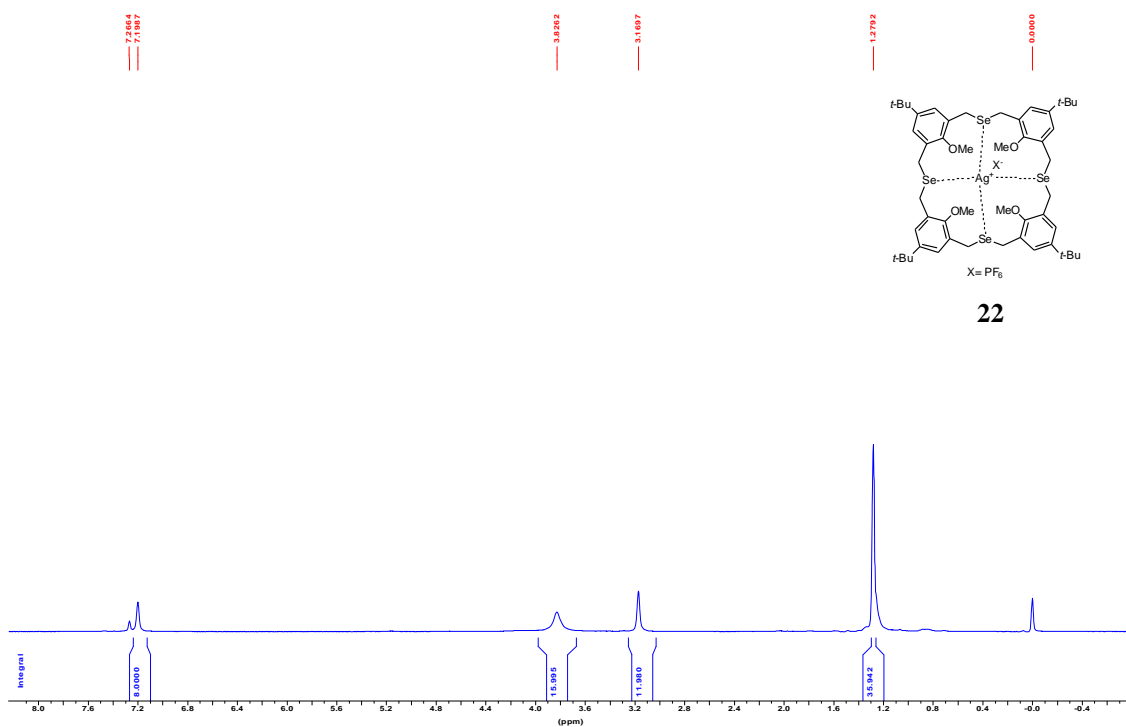

## 2. X-ray crystallographic general experimental data and additional figures for the structures of homoselenacalix[*n*]arenes 4·THF, **10**, **19**, **20**, **21** and **22**

Single crystal X-ray diffraction data for compounds **10**, **19**, **20** and **21** were collected on a SMART 6000 diffractometer with CCD detector using CuK $\alpha$  radiation ( $\lambda = 1.54178 \text{ \AA}$ , crossed Goebel mirrors) and phi and omega scans.<sup>1</sup> Cell refinement and data reduction were performed using the program SAINT.<sup>2</sup> Measurements for 4·THF and **22** were performed on a Kuma KM4CCD  $\kappa$ -axis diffractometer with graphite-monochromated MoK $\alpha$  radiation ( $\lambda = 0.71073 \text{ \AA}$ ). Data collection and data reduction were carried out with the Oxford Diffraction programs.<sup>3</sup> The structures were solved by direct methods and refined by full-matrix least squares on  $|F^2|$  using the SHELXS-97 program.<sup>4</sup> All data collections were carried out at 100(2) K to minimize solvent loss, possible structural disorder and thermal motion effects. All non-hydrogen atoms were anisotropically refined and the hydrogen atoms were placed on calculated positions with temperature factors fixed at 1.2 times  $U_{eq}$  of the parent atoms and 1.5 times  $U_{eq}$  for methyl groups. The program Mercury was used to prepare molecular graphics images.<sup>5</sup> Some of the *tert*-butyl groups were disordered over two orientations, namely C26 in **10**, C70 in **19** and C34 in **21** as well as the counter ions in **21** and **22** ( $\text{PF}_6^-$  located on a special position).

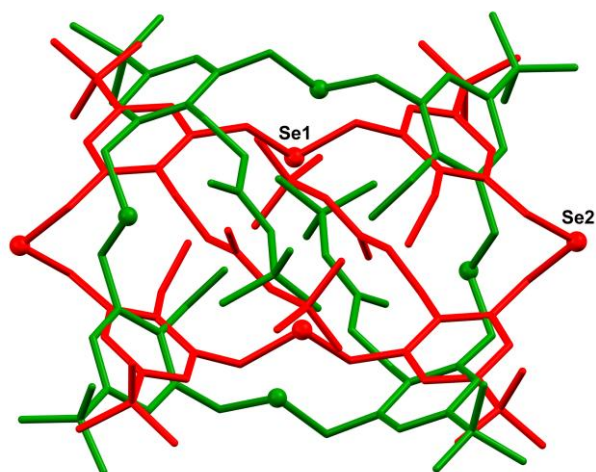

**Fig. S1** Overlay of the structure of homoselenacalix[4]arene **10** (shown in red) with the previously reported analogous homothiocalix[4]arene<sup>6</sup> (shown in green); Se/S atoms are represented by balls.

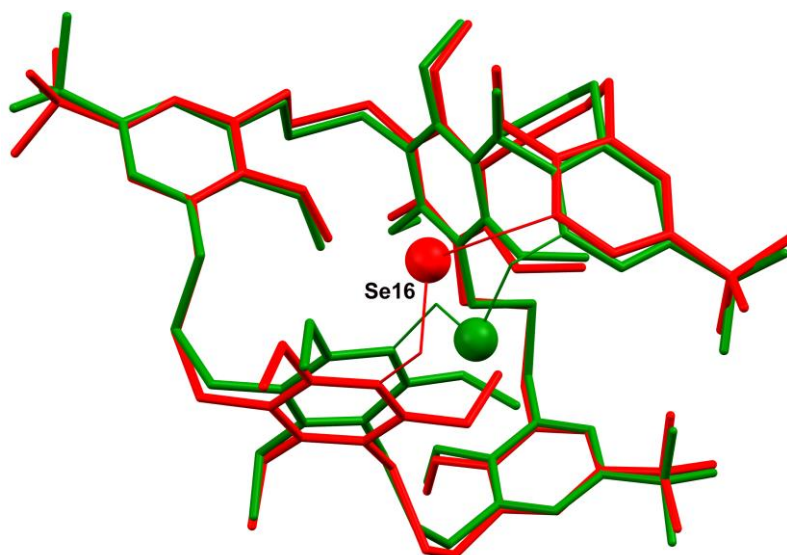

**Fig. S2** Overlay of bicyclohomoselenacalix[4]arene **19** (shown in red) with the earlier reported analogous bicyclohomothiocalix[4]arene<sup>6</sup> (shown in green), showing a different geometry around one of the heteroatom bridges.



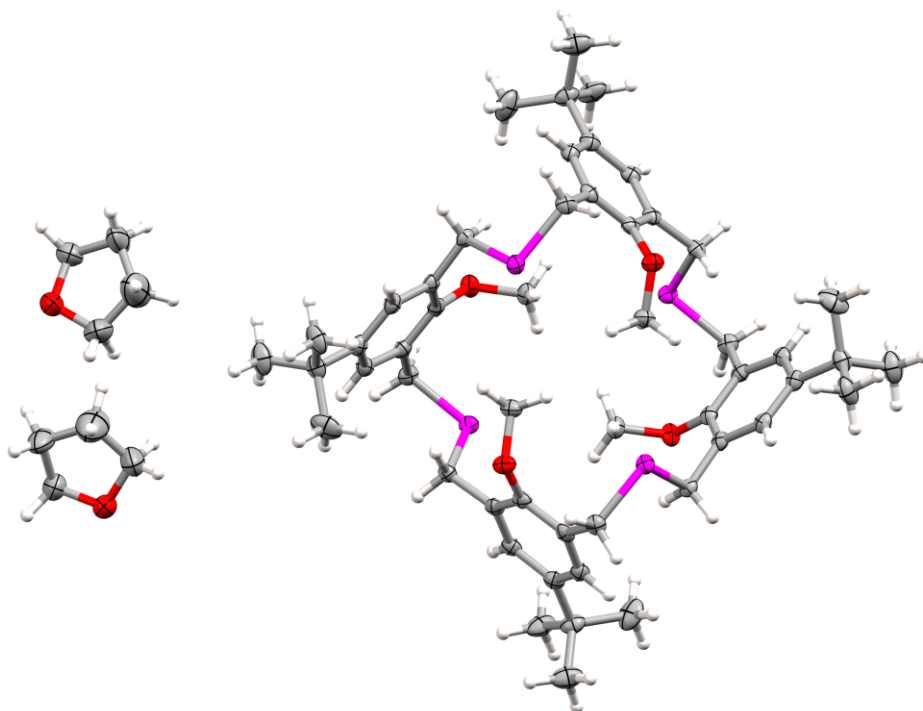

**Fig. S3** Molecular structure of the THF solvate of homoselenacalix[4]arene **4** (thermal ellipsoids are drawn at 50% probability).

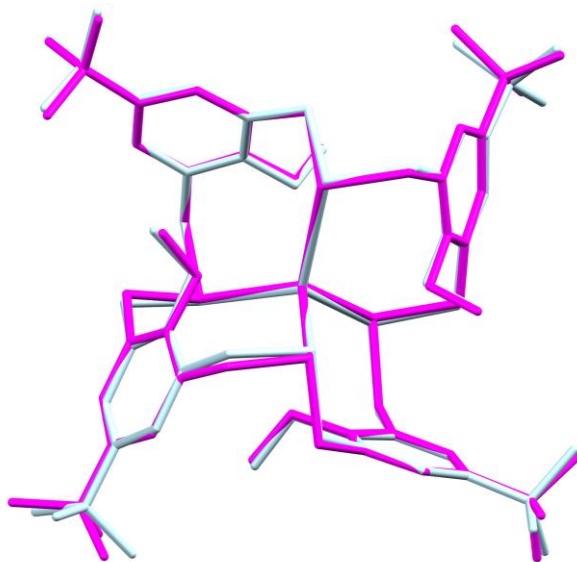

**Fig. S4** Overlay of Ag(I) complexes **21** (purple) and **22** (blue-grey), presenting approximately the same conformation of the calixarene units adopted after complexation.

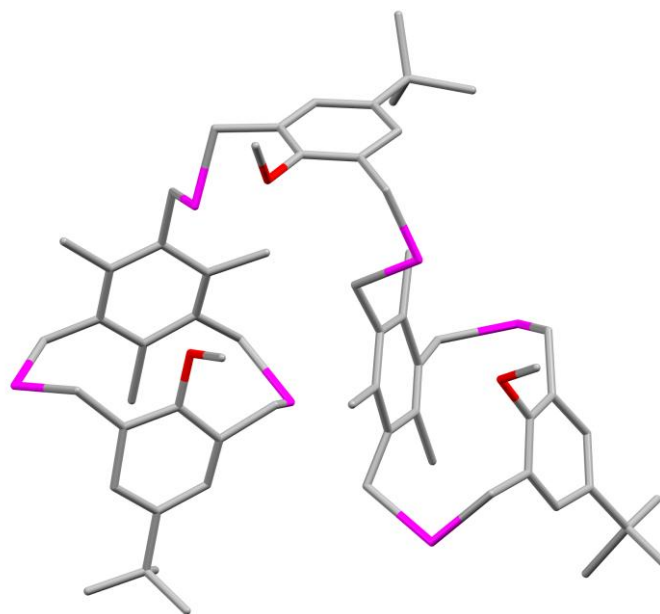

**Fig. S5** Capped-sticks representation of the (non-refined) structure of bis(selenacyclophane) 20.

### 3. FTMS (ESI<sup>+</sup>) isotopic patterns for homoselenacalix[4]arene **10** and metal complexes **21** and **22**

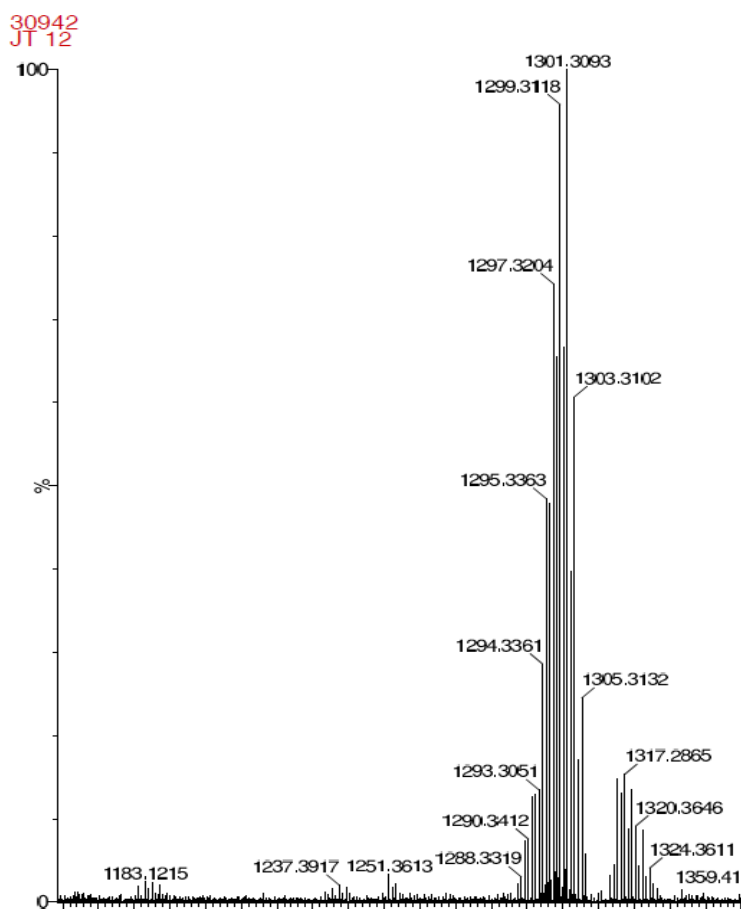

**Fig. S6** Observed high resolution FTMS (ESI<sup>+</sup>) isotopic pattern for homoselenacalix[4]arene **10** ([M+Na]<sup>+</sup>).

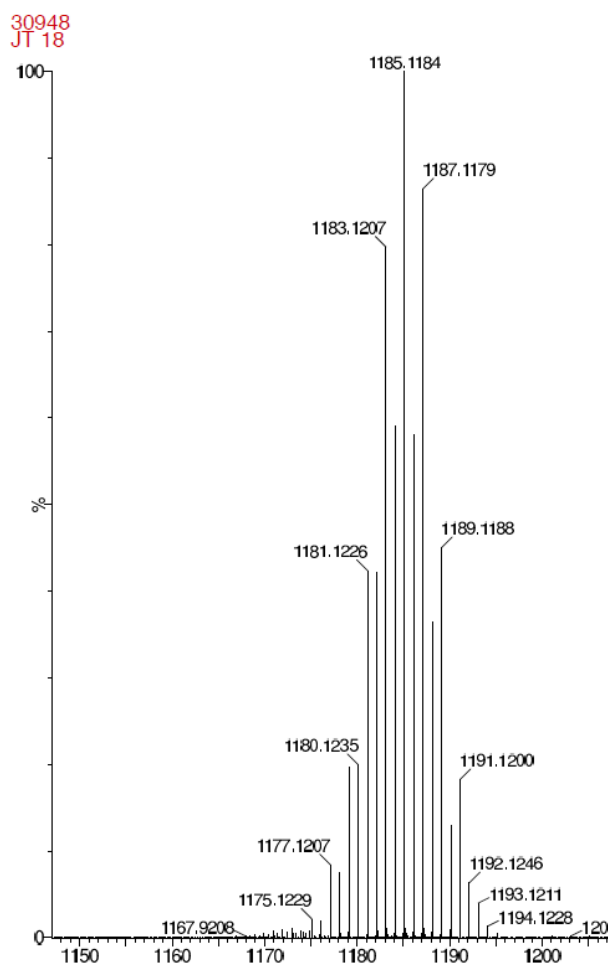

**Fig. S7** Observed high resolution FTMS (ESI<sup>+</sup>) isotopic pattern for complex **21** ([M-CF<sub>3</sub>SO<sub>3</sub>]<sup>+</sup>).

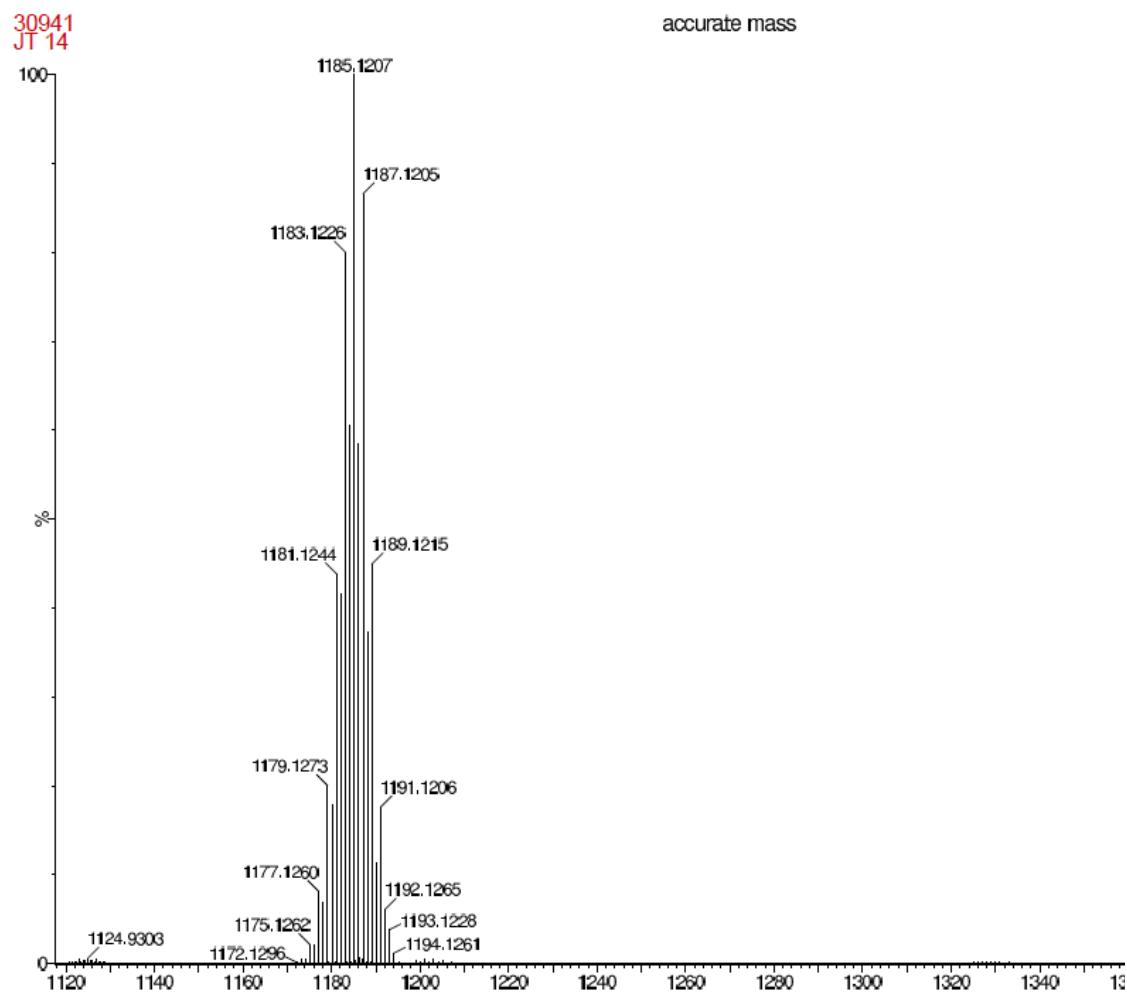

**Fig. S8** Observed high resolution FTMS ( $\text{ESI}^+$ ) isotopic pattern for complex **22** ( $[\text{M-PF}_6]^+$ ).

#### 4. References

- 1 SMART, Version 5.625, Bruker AXS Inc., Madison, Wisconsin, USA, 1997.
- 2 SAINT, Version 5/6.0, Bruker AXS Inc., Madison, Wisconsin, USA, 1997.
- 3 CrysAlis CCD and CrysAlis RED, Version 1.171.33.52, Oxford Diffraction Ltd, Abingdon, Oxfordshire, England, 2009.
- 4 G. M. Sheldrick, *Acta Cryst.*, 2008, **A64**, 112.
- 5 C. F. Macrae, I. J. Bruno, J. A. Chisholm, P. R. Edgington, P. McCabe, E. Pidcock, L. Rodriguez-Monge, R. Taylor, J. van de Streek and P. A. Wood, *J. Appl. Cryst.*, 2008, **41**, 466.
- 6 J. Thomas, K. Van Hecke, K. Robeyns, W. Van Rossom, M. P. Sonawane, L. Van Meervelt, M. Smet, W. Maes and W. Dehaen, *Chem. Eur. J.*, 2011, **17**, 10339.
